# Supplementary material for: Robust model-based analysis of single-particle tracking experiments with Spot-On
Source: eLife journal article supplement (doi:10.7554/elife.33125), 2018-01-04

A

Displacement histograms for 2-state model with state transitions and Spot-On model-fits for different  $k_{\text{ON}}$  and  $k_{\text{OFF}}$   
 Fixed parameters:  $D_{\text{FREE}} = 2.5 \mu\text{m}^2/\text{s}$ ;  $D_{\text{BOUND}} = 0.001 \mu\text{m}^2/\text{s}$ ;  $F_{\text{BOUND}} = 40\%$ ;  $\sigma = 25 \text{ nm}$

$$k_{\text{OFF}} = \frac{k_{\text{ON}}(1 - F_{\text{BOUND}})}{F_{\text{BOUND}}}$$

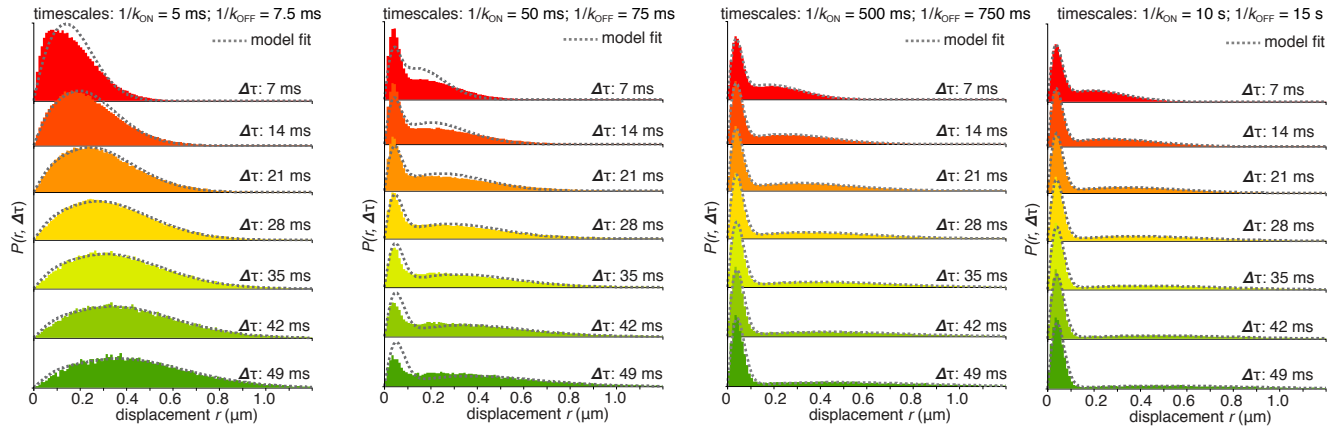

B

$D_{\text{FREE}} = 2.0 \mu\text{m}^2/\text{s}$ ;  
 $D_{\text{BOUND}} = 0.001 \mu\text{m}^2/\text{s}$ ;  
 $F_{\text{BOUND}} = 75\%$ ;

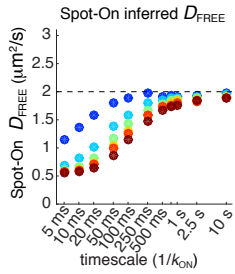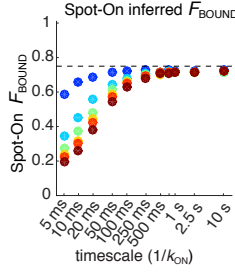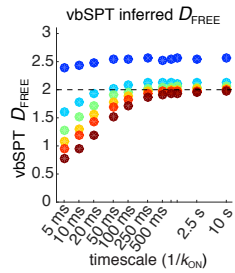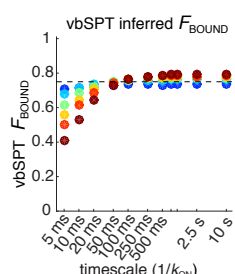

C

$D_{\text{FREE}} = 2.5 \mu\text{m}^2/\text{s}$ ;  
 $D_{\text{BOUND}} = 0.001 \mu\text{m}^2/\text{s}$ ;  
 $F_{\text{BOUND}} = 40\%$ ;

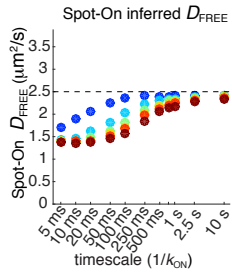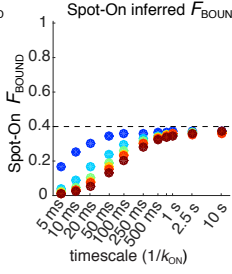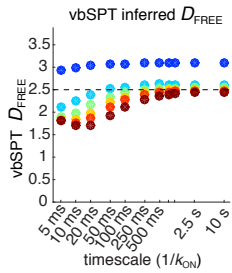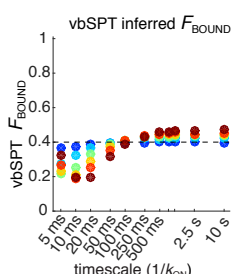

D

$D_{\text{FREE}} = 3.5 \mu\text{m}^2/\text{s}$ ;  
 $D_{\text{BOUND}} = 0.001 \mu\text{m}^2/\text{s}$ ;  
 $F_{\text{BOUND}} = 70\%$ ;

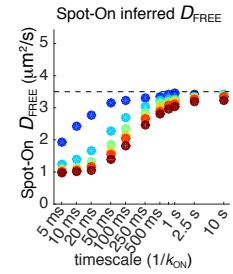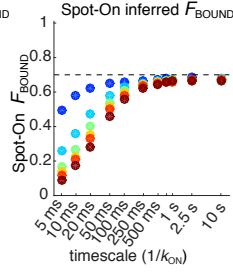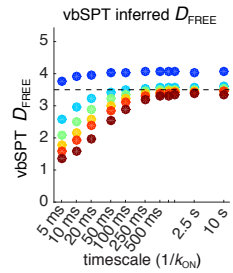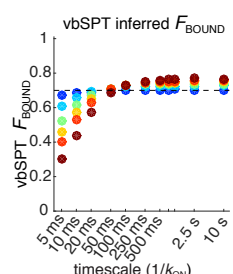

E

$D_{\text{FREE}} = 6.0 \mu\text{m}^2/\text{s}$ ;  
 $D_{\text{BOUND}} = 0.001 \mu\text{m}^2/\text{s}$ ;  
 $F_{\text{BOUND}} = 5\%$ ;

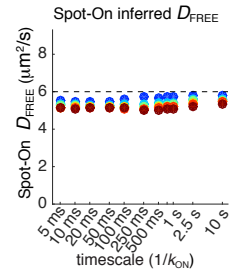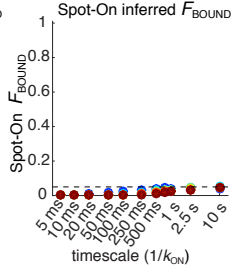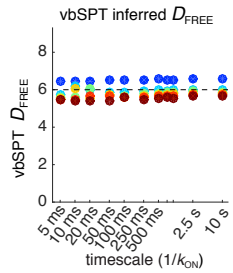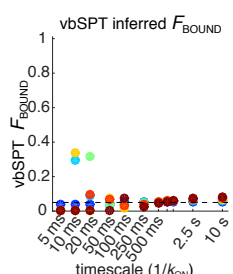

F

$D_{\text{FREE}} = 10.0 \mu\text{m}^2/\text{s}$ ;  
 $D_{\text{BOUND}} = 0.001 \mu\text{m}^2/\text{s}$ ;  
 $F_{\text{BOUND}} = 10\%$ ;

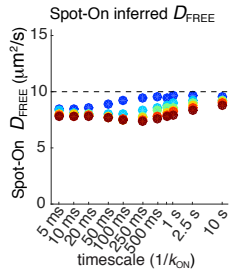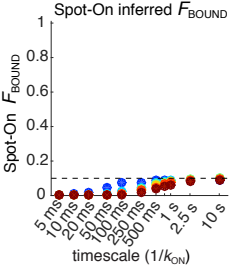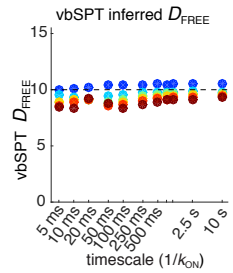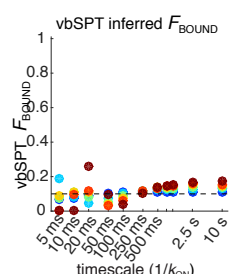

G

$D_{\text{FREE}} = 13.0 \mu\text{m}^2/\text{s}$ ;  
 $D_{\text{BOUND}} = 0.001 \mu\text{m}^2/\text{s}$ ;  
 $F_{\text{BOUND}} = 55\%$ ;

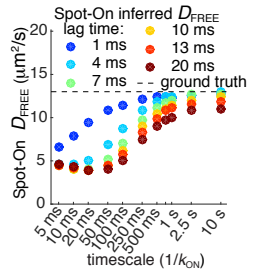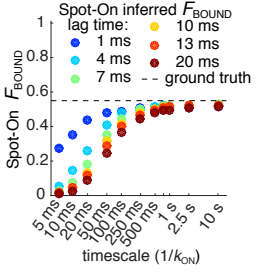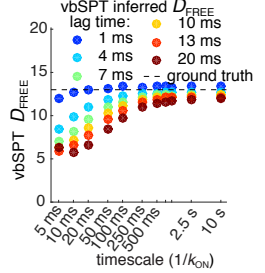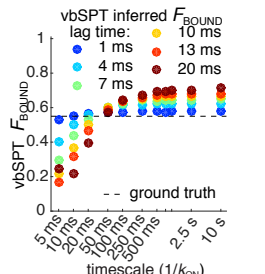

Supplement: supp [file elife-33125-supp-v1.zip]
