# Supplementary material for: Robust model-based analysis of single-particle tracking experiments with Spot-On
Source: eLife journal article supplement (doi:10.7554/elife.33125), 2018-01-04
Supplement: supp [file elife-33125-supp-v1.zip]

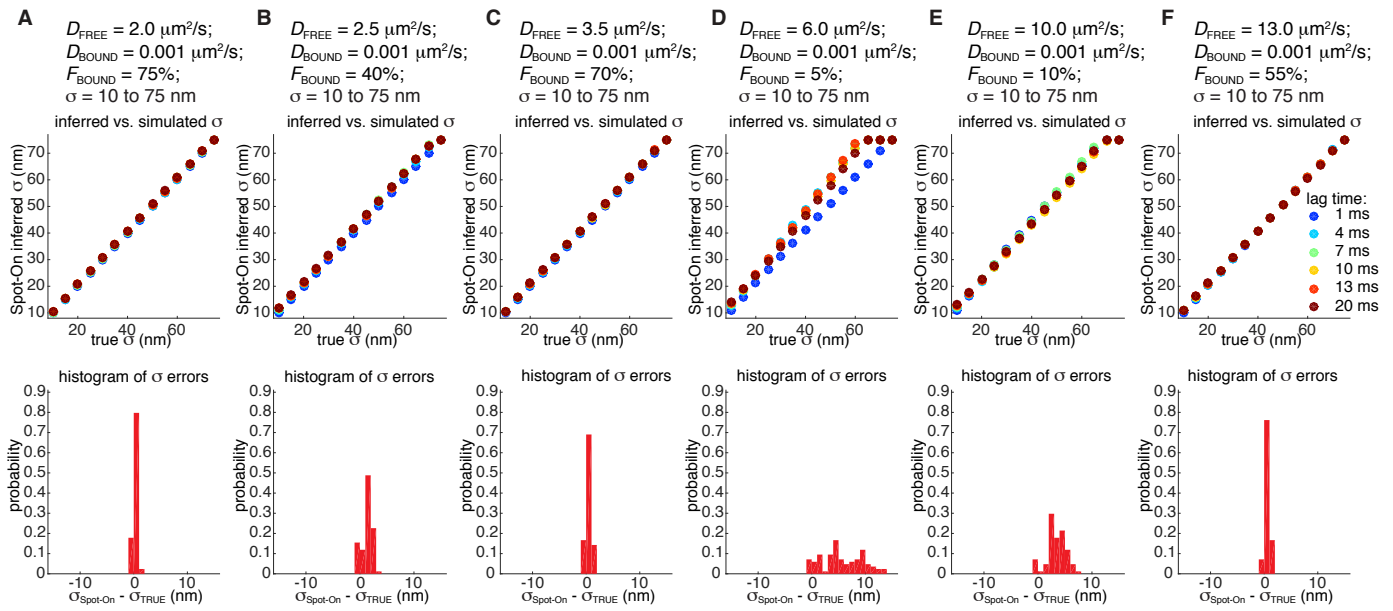

**G**

| simulation parameters:                                                        | error ( $\sigma_{\text{Spot-On}} - \sigma_{\text{TRUE}}$ ) statistics |      |      |
|-------------------------------------------------------------------------------|-----------------------------------------------------------------------|------|------|
|                                                                               | bias (nm):                                                            | std: | iqr: |
| $D_{\text{FREE}} = 2.0 \mu\text{m}^2/\text{s}$ ; $F_{\text{BOUND}} = 75\%$ ;  | 0.42                                                                  | 0.34 | 0.58 |
| $D_{\text{FREE}} = 2.5 \mu\text{m}^2/\text{s}$ ; $F_{\text{BOUND}} = 40\%$ ;  | 1.39                                                                  | 0.91 | 1.12 |
| $D_{\text{FREE}} = 3.5 \mu\text{m}^2/\text{s}$ ; $F_{\text{BOUND}} = 70\%$ ;  | 0.61                                                                  | 0.40 | 0.54 |
| $D_{\text{FREE}} = 6.0 \mu\text{m}^2/\text{s}$ ; $F_{\text{BOUND}} = 5\%$ ;   | 5.75                                                                  | 3.79 | 6.02 |
| $D_{\text{FREE}} = 10.0 \mu\text{m}^2/\text{s}$ ; $F_{\text{BOUND}} = 10\%$ ; | 3.52                                                                  | 1.67 | 2.54 |
| $D_{\text{FREE}} = 13.0 \mu\text{m}^2/\text{s}$ ; $F_{\text{BOUND}} = 55\%$ ; | 0.73                                                                  | 0.31 | 0.26 |
