# Supplementary material for: Robust model-based analysis of single-particle tracking experiments with Spot-On
Source: eLife journal article supplement (doi:10.7554/elife.33125), 2018-01-04

**A**simulation results (4  $\mu\text{m}$  nuclear radius): relative error in estimate of  $D_{\text{FREE}}$ 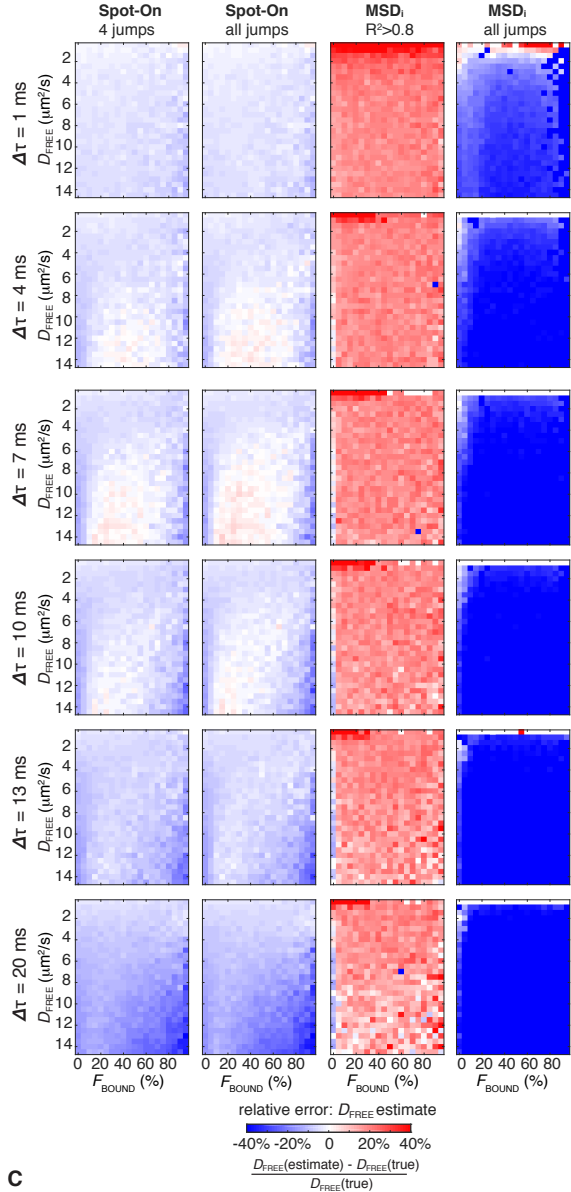**C**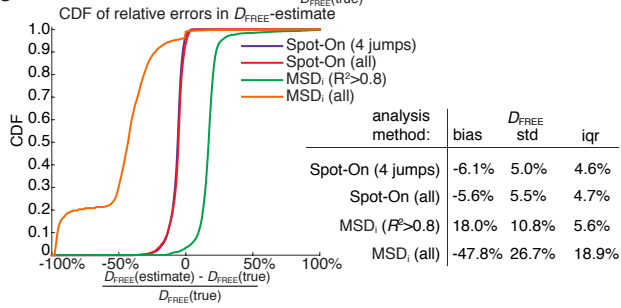**B**simulation results (4  $\mu\text{m}$  nuclear radius): relative error in estimate of  $F_{\text{BOUND}}$ 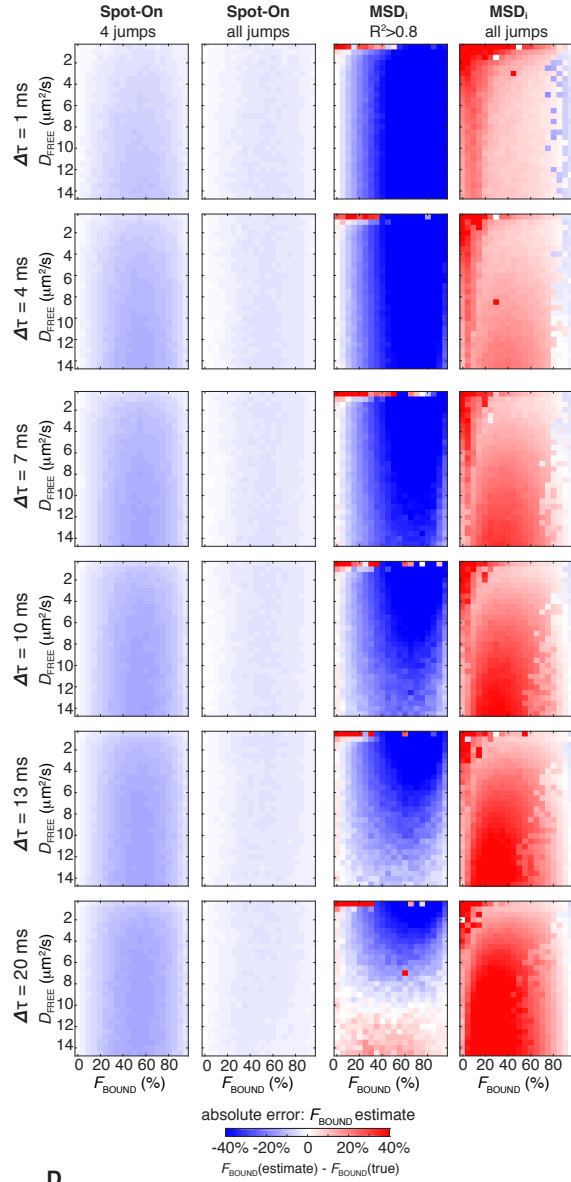**D**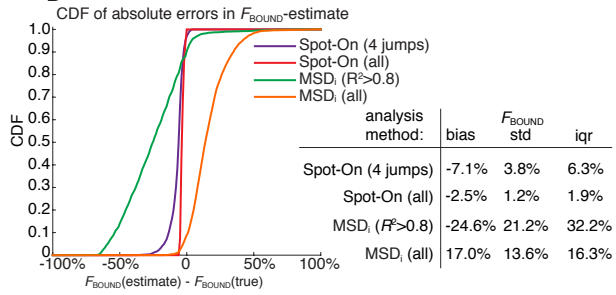

Supplement: supp [file elife-33125-supp-v1.zip]
