# Supplementary material for: Robust model-based analysis of single-particle tracking experiments with Spot-On
Source: eLife journal article supplement (doi:10.7554/elife.33125), 2018-01-04

**A** jack-knife sampling for simulation:  $D_{\text{FREE}} = 2.0 \mu\text{m}^2/\text{s}$ ;  
 $D_{\text{BOUND}} = 0.001 \mu\text{m}^2/\text{s}$ ;  $F_{\text{BOUND}} = 75\%$ ;  $\Delta\tau = 1 \text{ ms}$

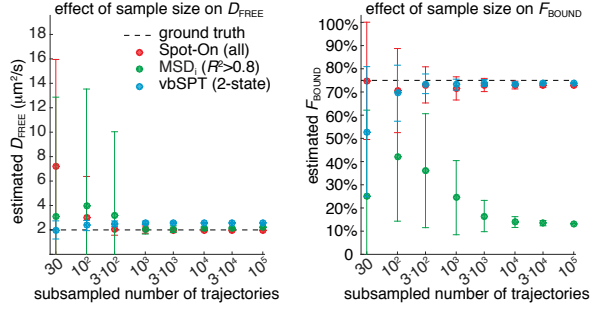

**B** jack-knife sampling for simulation:  $D_{\text{FREE}} = 10.0 \mu\text{m}^2/\text{s}$ ;  
 $D_{\text{BOUND}} = 0.001 \mu\text{m}^2/\text{s}$ ;  $F_{\text{BOUND}} = 10\%$ ;  $\Delta\tau = 4 \text{ ms}$

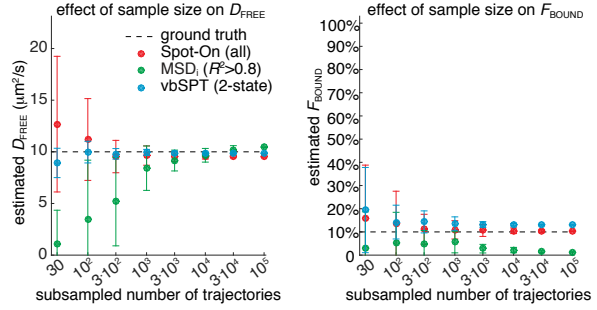

**C** jack-knife sampling for simulation:  $D_{\text{FREE}} = 3.5 \mu\text{m}^2/\text{s}$ ;  
 $D_{\text{BOUND}} = 0.001 \mu\text{m}^2/\text{s}$ ;  $F_{\text{BOUND}} = 50\%$ ;  $\Delta\tau = 7 \text{ ms}$

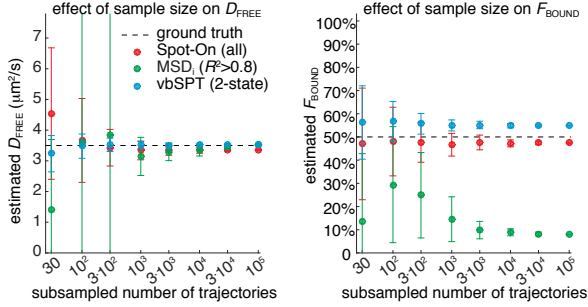

**D** jack-knife sampling for simulation:  $D_{\text{FREE}} = 3.5 \mu\text{m}^2/\text{s}$ ;  
 $D_{\text{BOUND}} = 0.001 \mu\text{m}^2/\text{s}$ ;  $F_{\text{BOUND}} = 70\%$ ;  $\Delta\tau = 13 \text{ ms}$

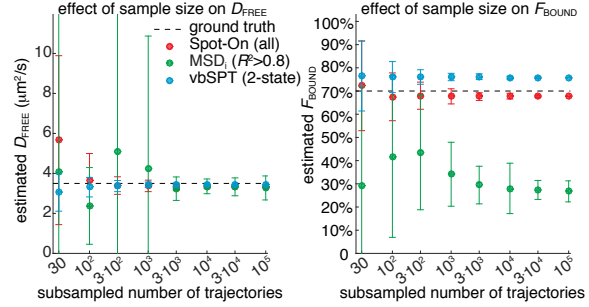

**E** jack-knife sampling for simulation:  $D_{\text{FREE}} = 13.0 \mu\text{m}^2/\text{s}$ ;  
 $D_{\text{BOUND}} = 0.001 \mu\text{m}^2/\text{s}$ ;  $F_{\text{BOUND}} = 55\%$ ;  $\Delta\tau = 20 \text{ ms}$

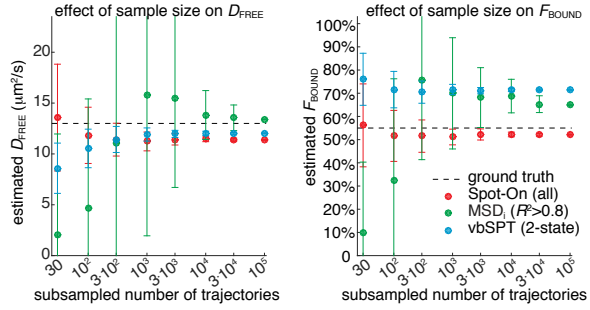

Supplement: supp [file elife-33125-supp-v1.zip]
