# Supplementary material for: Robust model-based analysis of single-particle tracking experiments with Spot-On
Source: eLife journal article supplement (doi:10.7554/elife.33125), 2018-01-04
Supplement: supp [file elife-33125-supp-v1.zip]

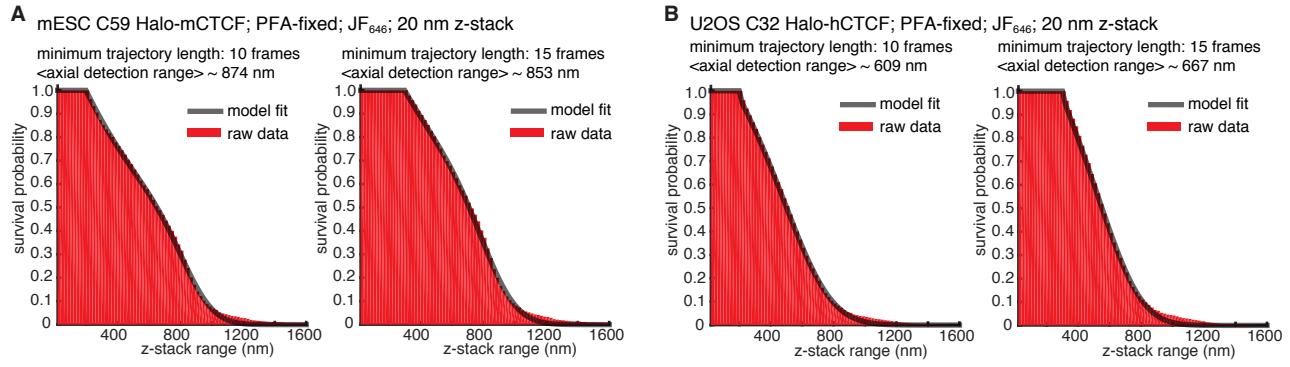

**C** summary of model for axial detection range measurements

$\tau$ : time in frames

$\tau_{\text{MIN}}$ : minimal trajectory length (10 or 15 frames)

$k_{\text{BLEACH}}$ : photobleaching rate constant

$\Delta z$ : axial detection range (Gaussian CDF mean)

$\sigma_z$ : Gaussian CDF sigma

major model assumptions:

1. photobleaching is a Poisson process
2. axial detection range can be modeled as a Gaussian CDF

fitted model:

$$\text{survival probability}(\tau) = \begin{cases} 1 & \text{if } \tau \leq \tau_{\text{MIN}} \\ e^{-k_{\text{BLEACH}}(\tau - \tau_{\text{MIN}})} \frac{1}{2} \left[ 1 - \text{erf}\left(\frac{(\tau - \tau_{\text{MIN}}) - (\Delta z - \tau_{\text{MIN}})}{\sqrt{2} \sigma_z}\right) \right] & \text{if } \tau > \tau_{\text{MIN}} \end{cases}$$
