# Supplementary figures and images for: Robust model-based analysis of single-particle tracking experiments with Spot-On
Source: eLife journal article supplement (doi:10.7554/elife.33125), 2018-01-04

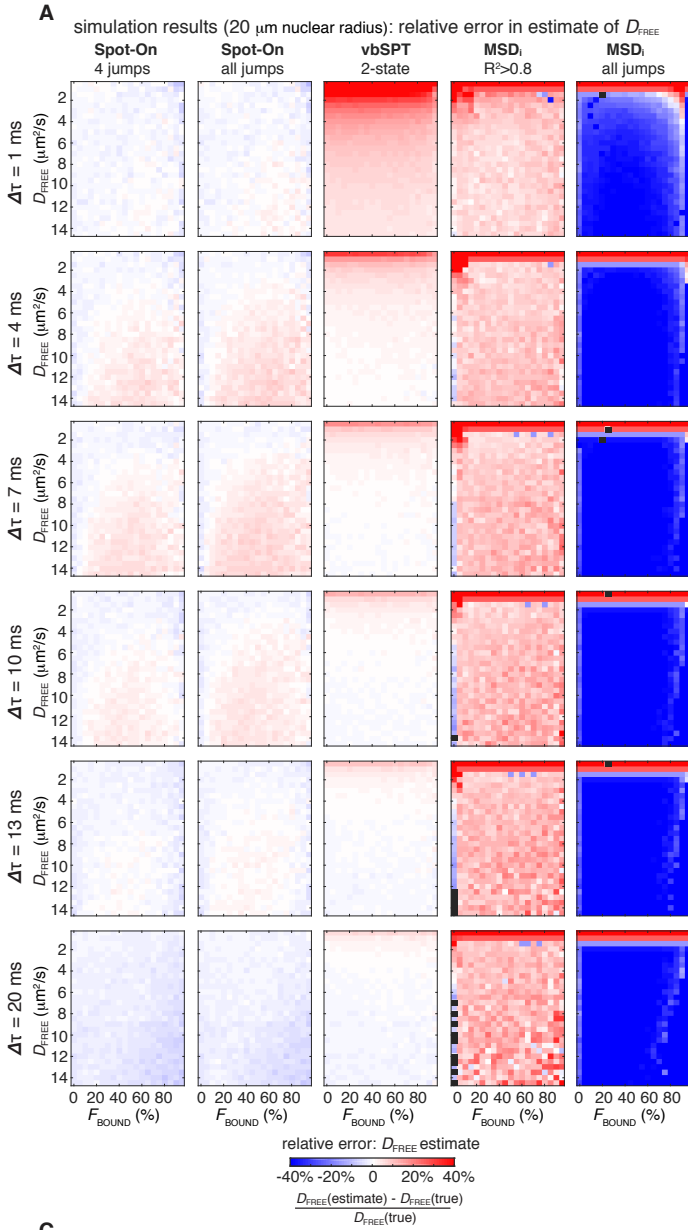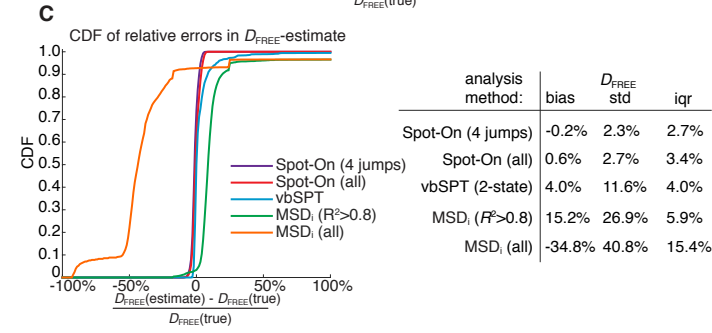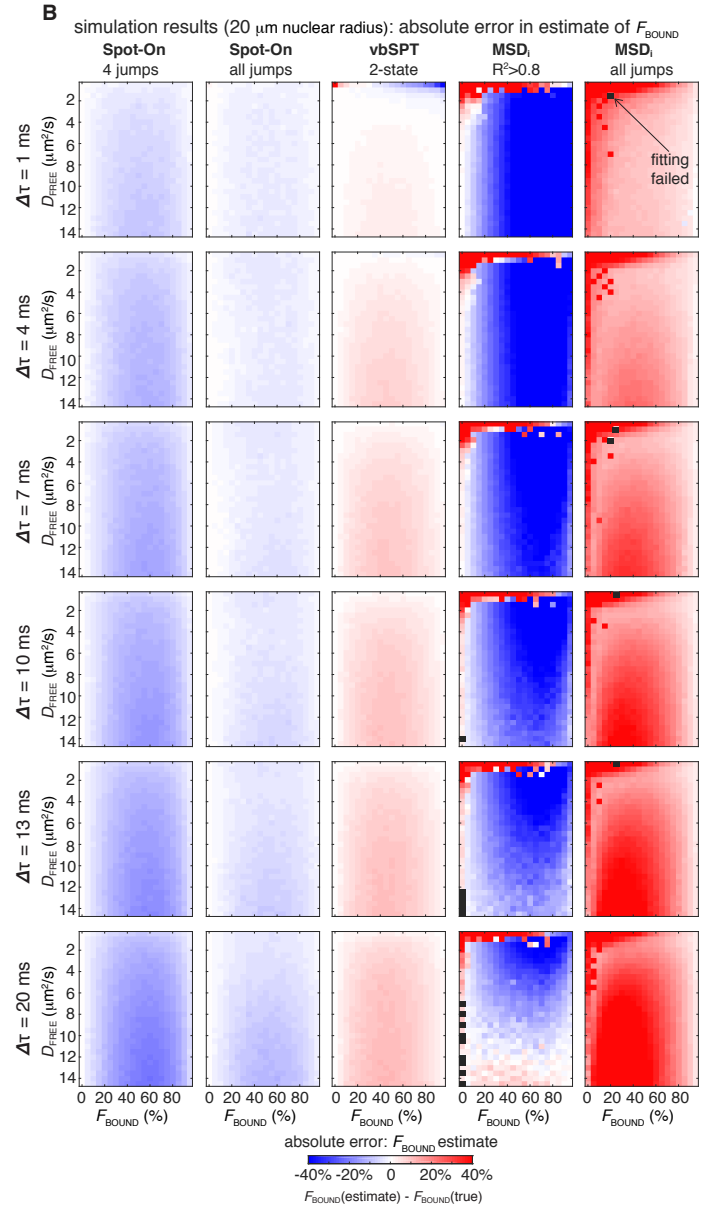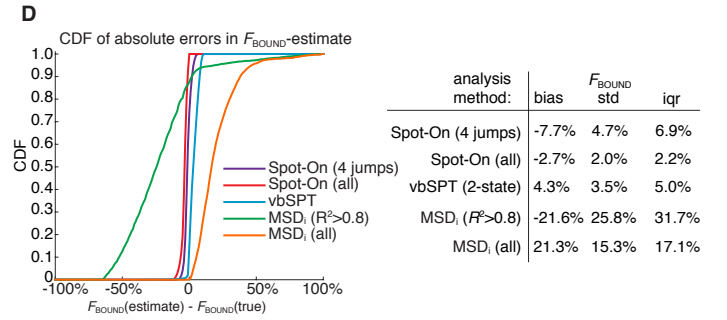

Supplement: supp [file elife-33125-supp-v1.zip]

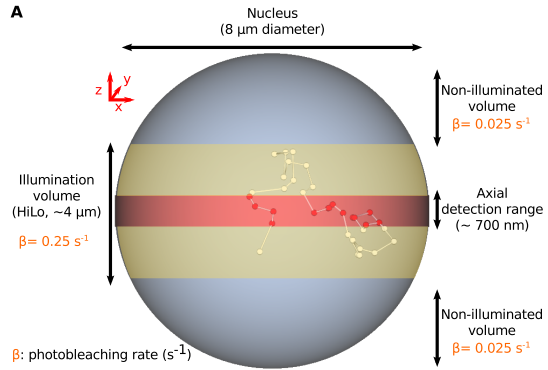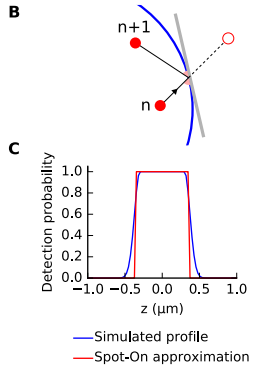

Supplement: supp [file elife-33125-supp-v1.zip]

## vbSPT (MaxHidden=2) analysis of all experiments

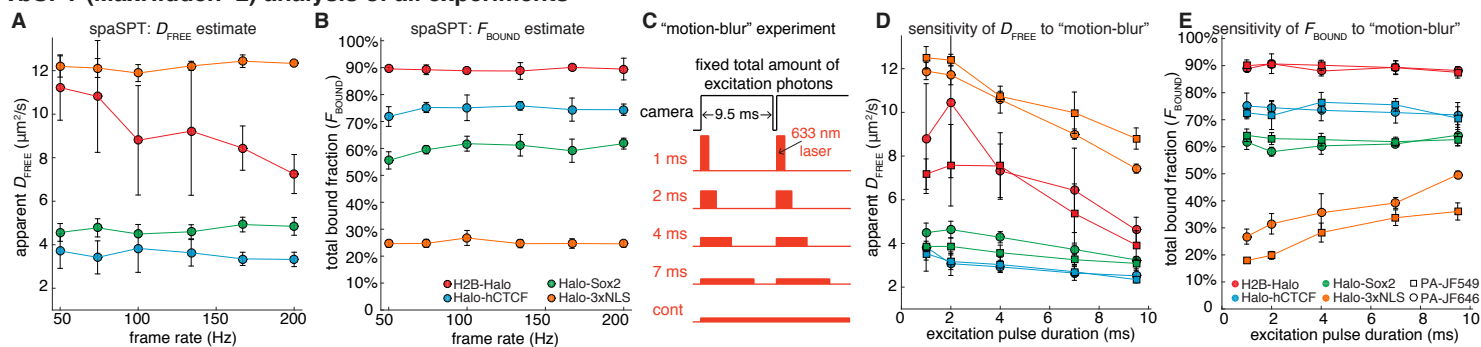

## Spot-On (JTC=4) analysis of all experiments

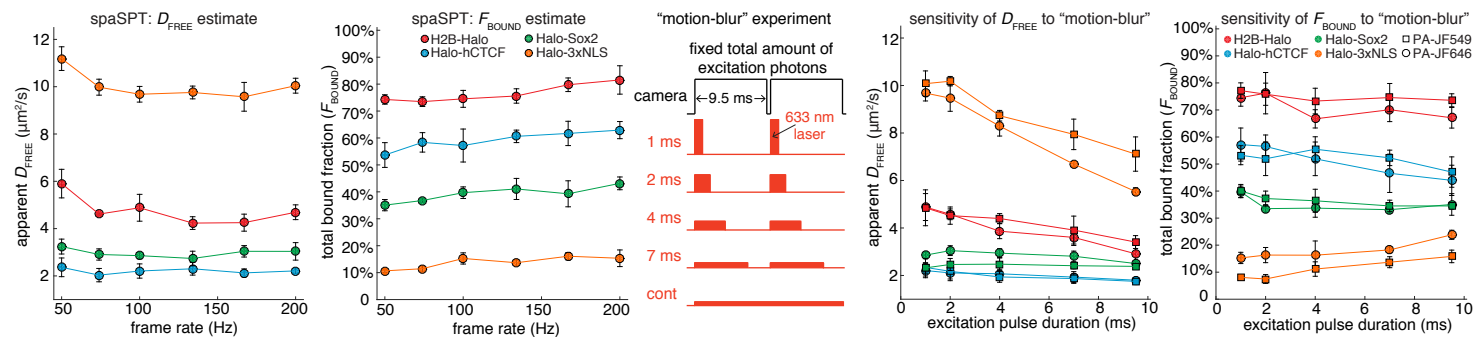

Supplement: supp [file elife-33125-supp-v1.zip]

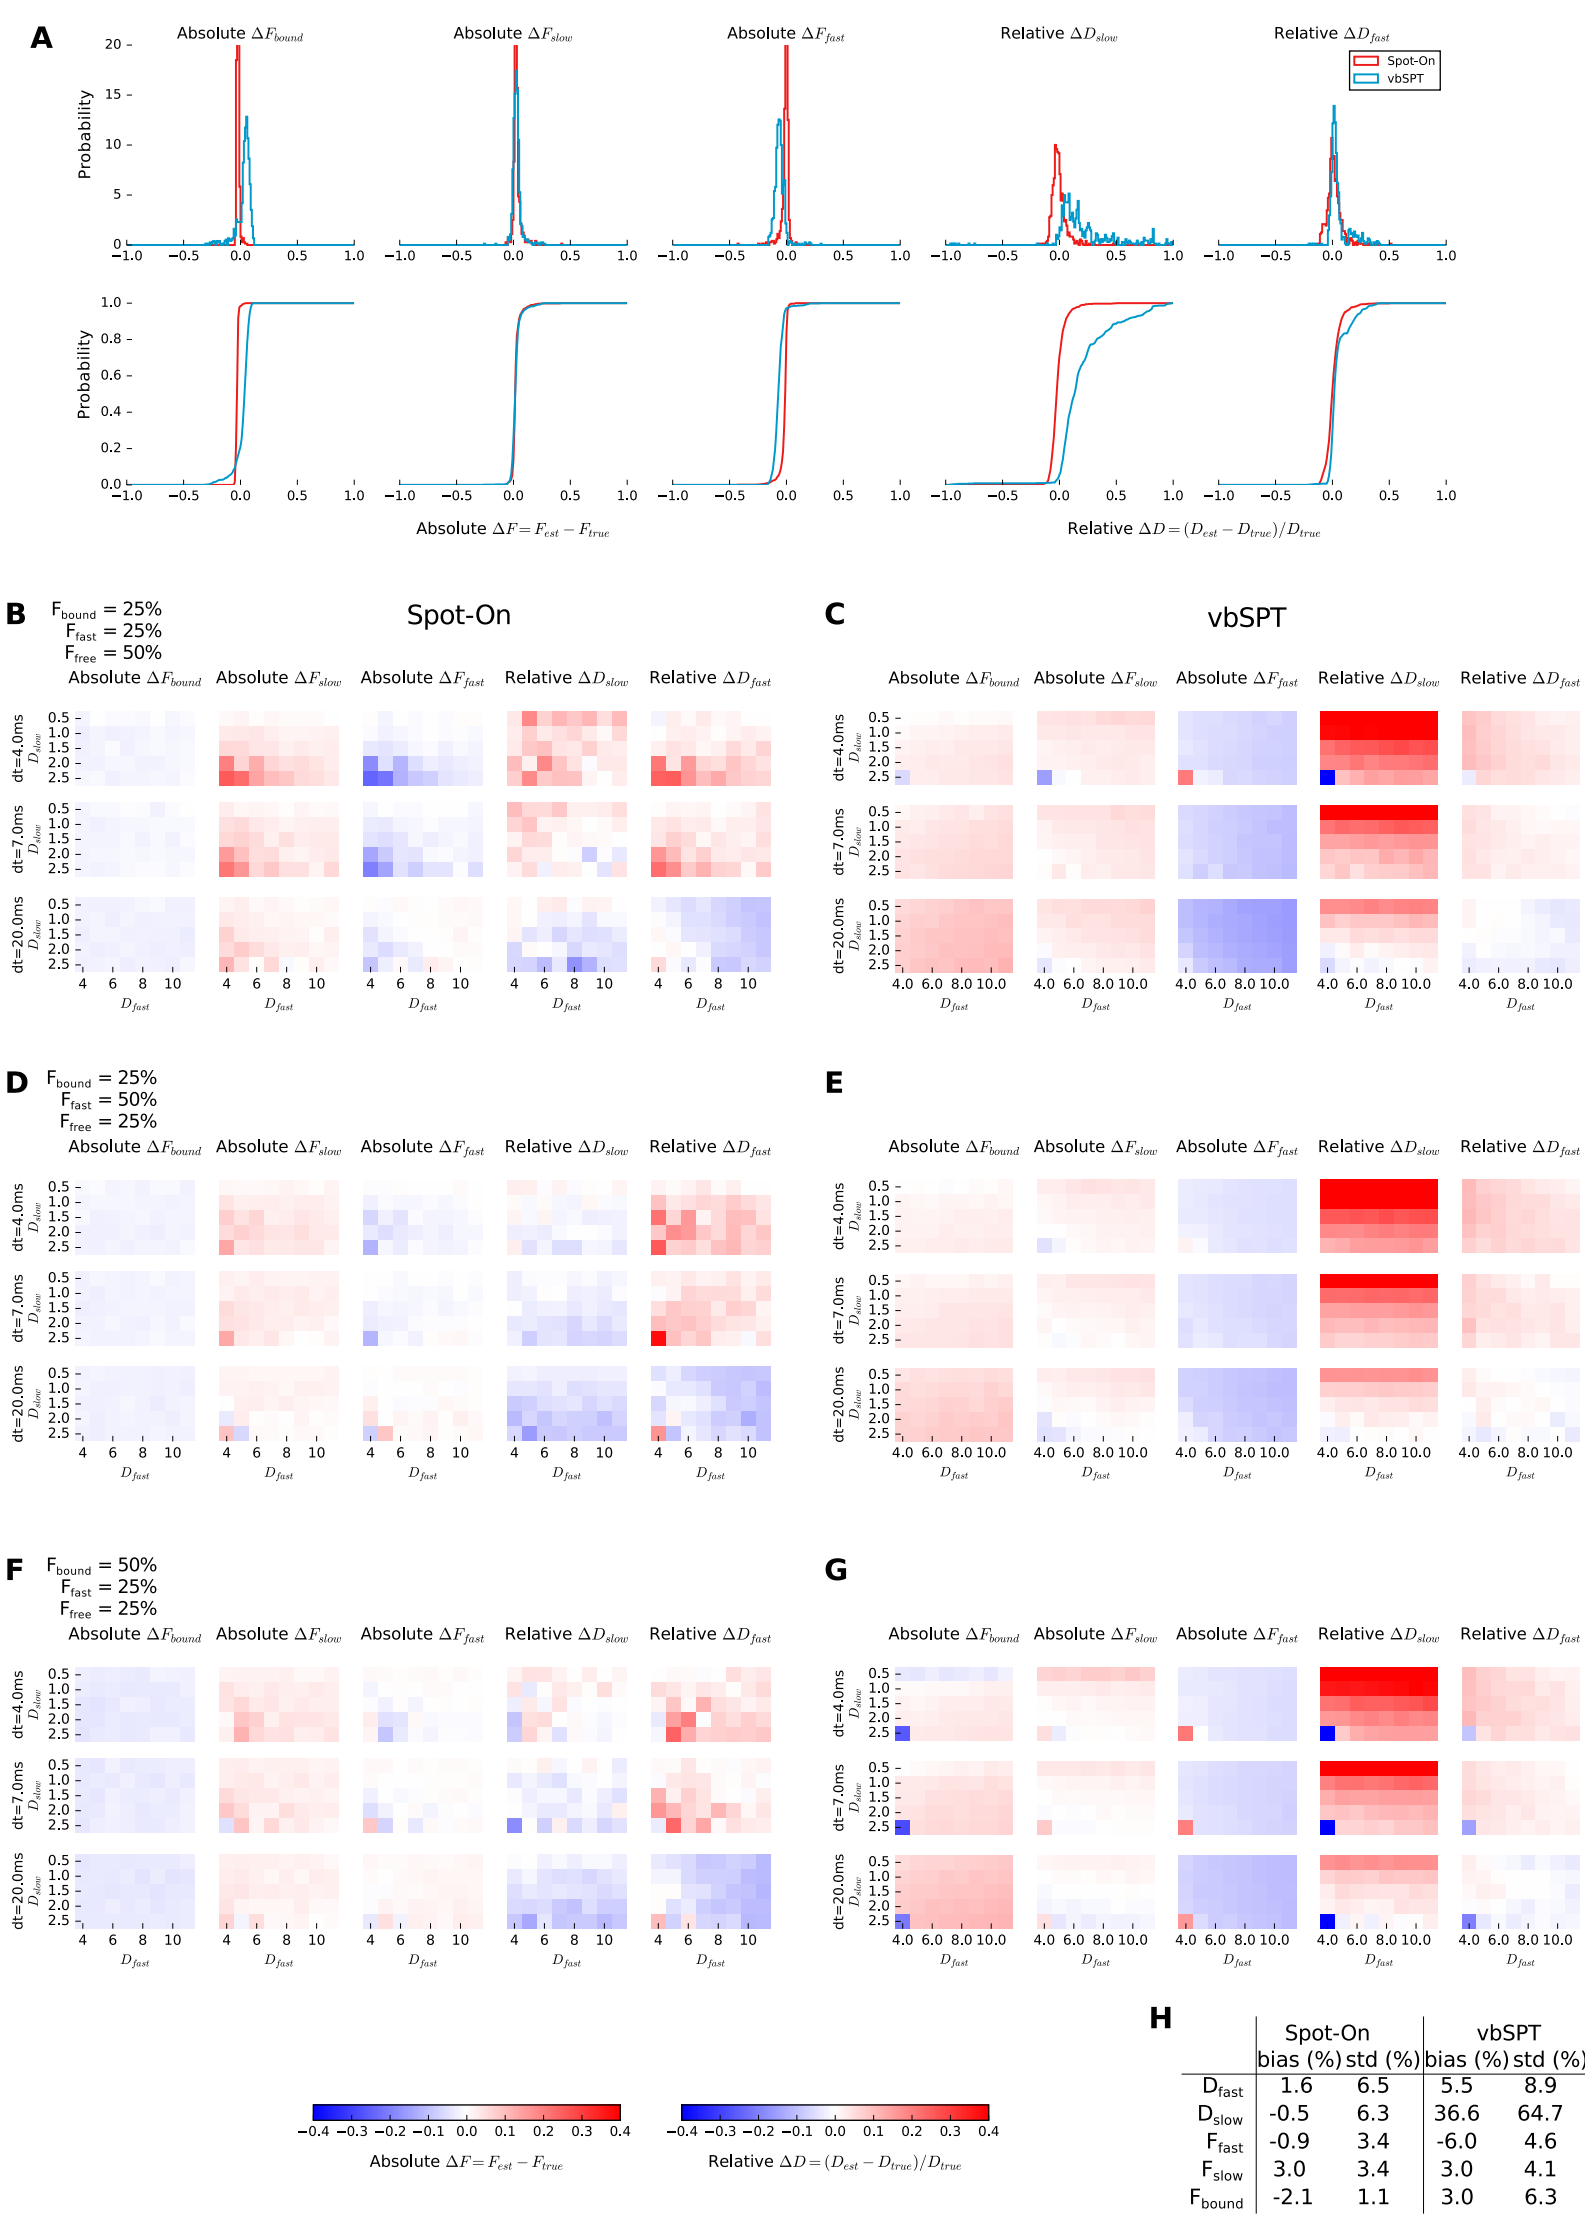

Supplement: supp [file elife-33125-supp-v1.zip]

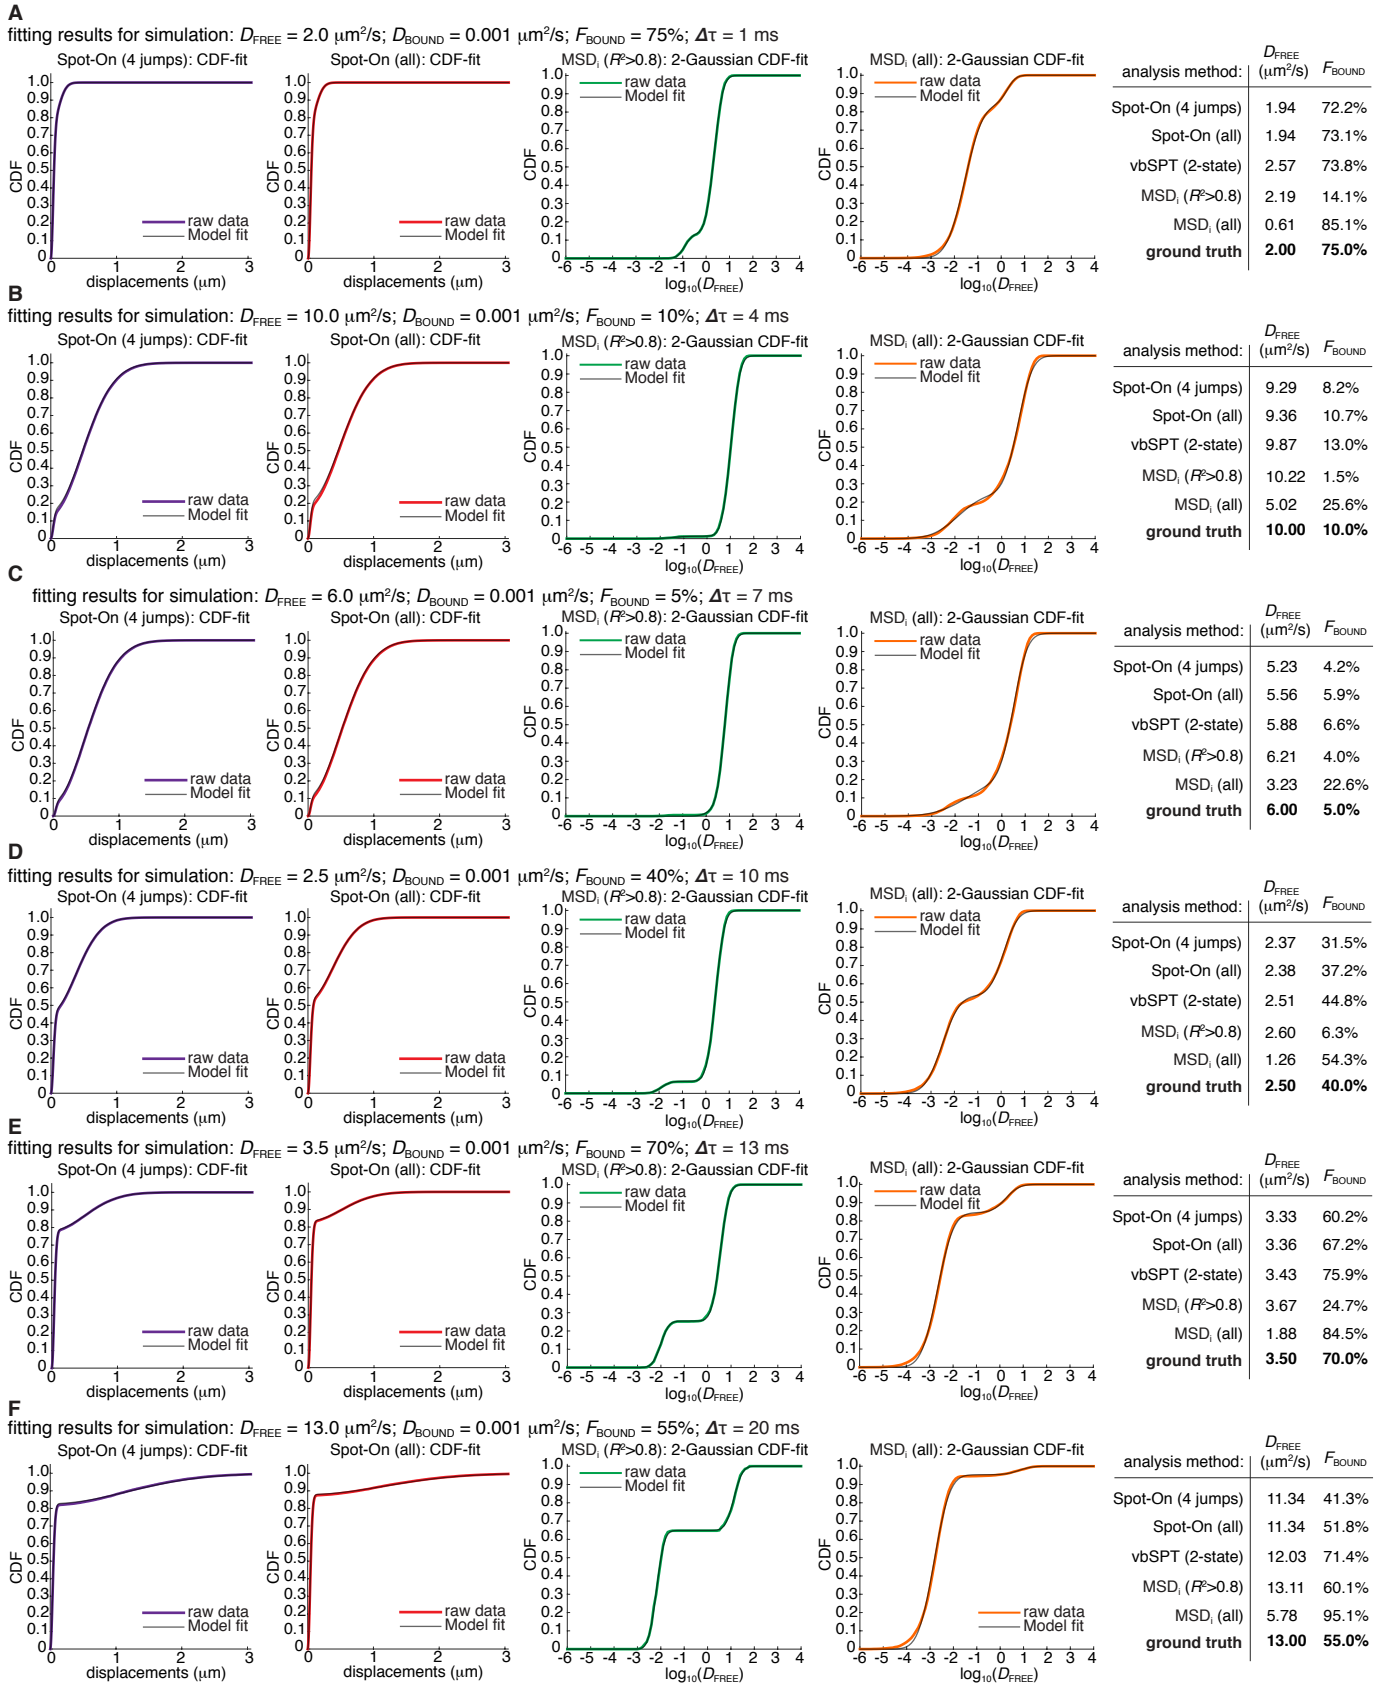

Supplement: supp [file elife-33125-supp-v1.zip]

**A**

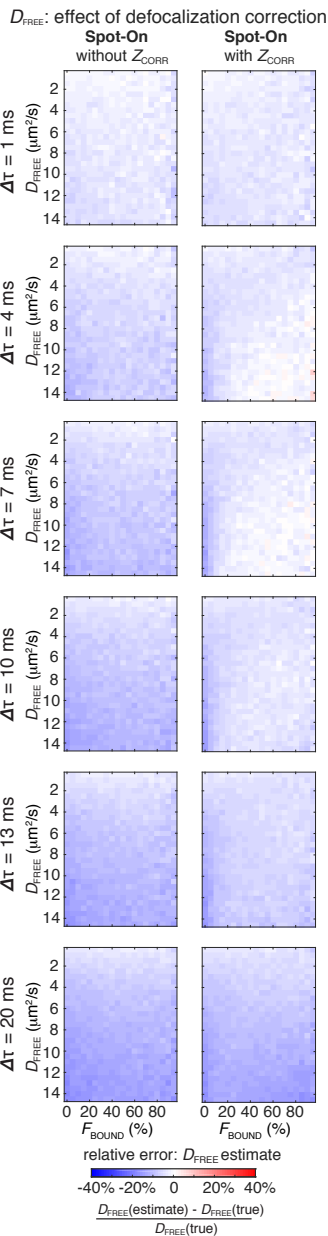

**B**

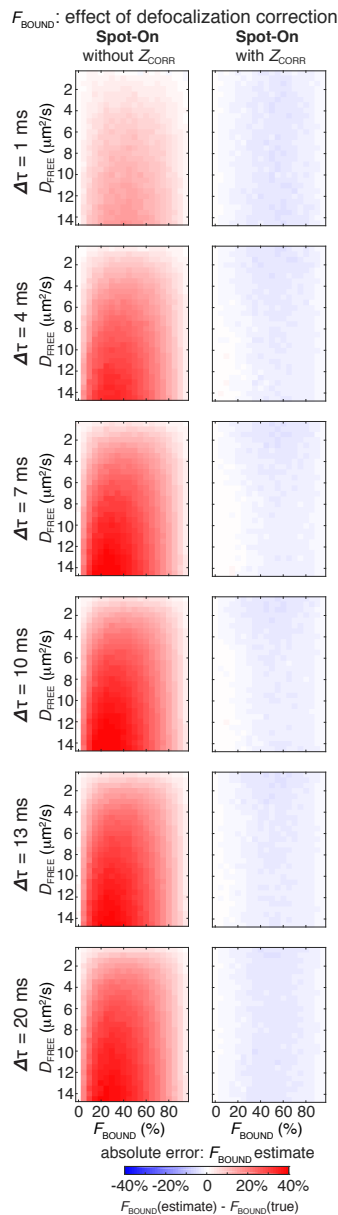

**C**

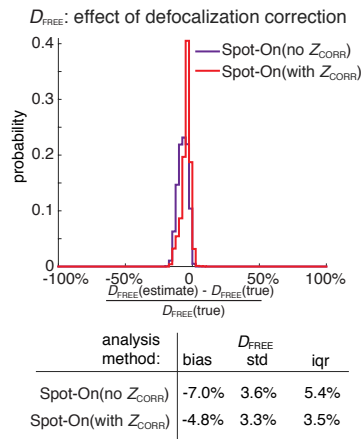

**D**

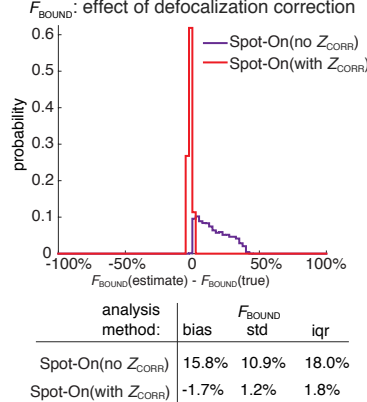

Supplement: supp [file elife-33125-supp-v1.zip]

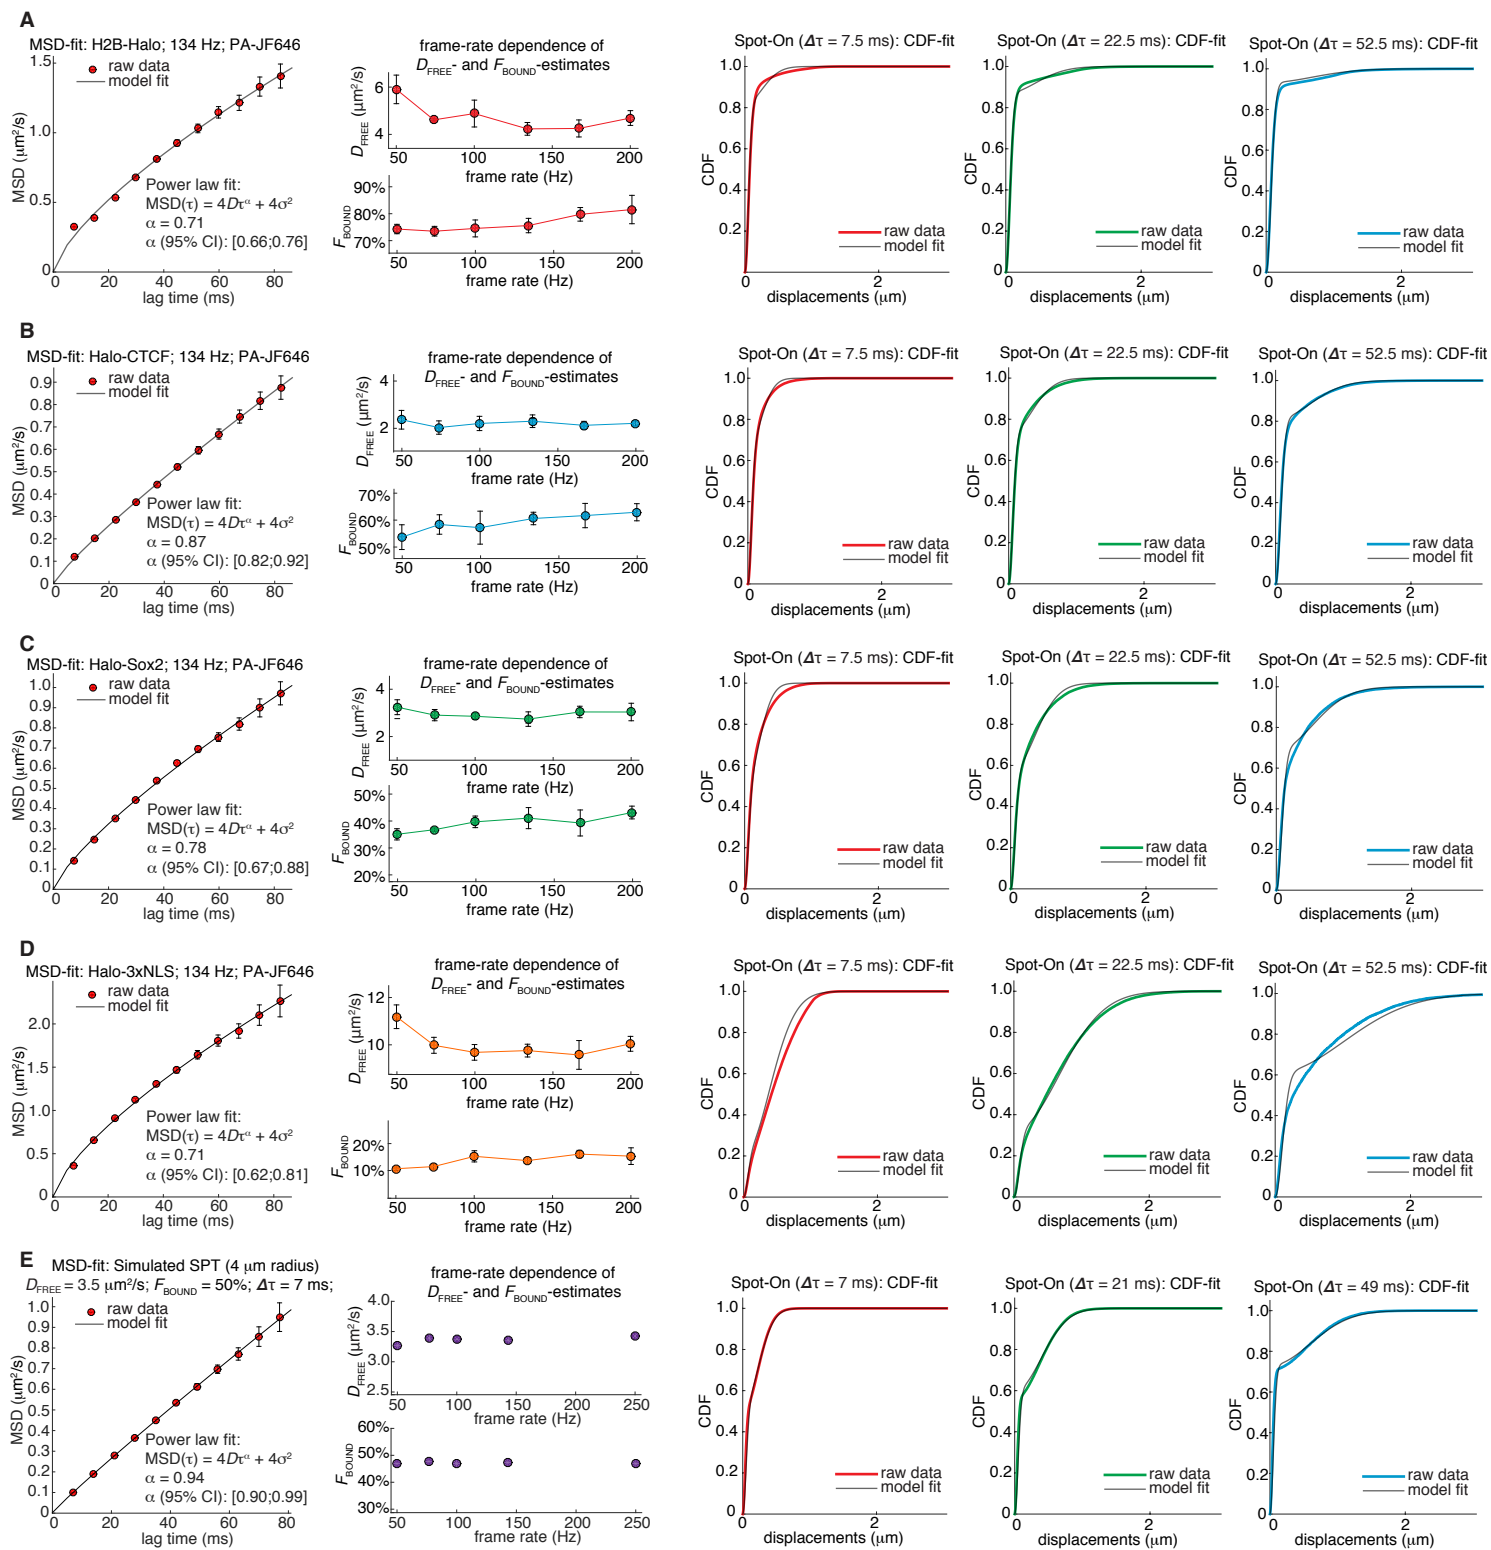

Supplement: supp [file elife-33125-supp-v1.zip]

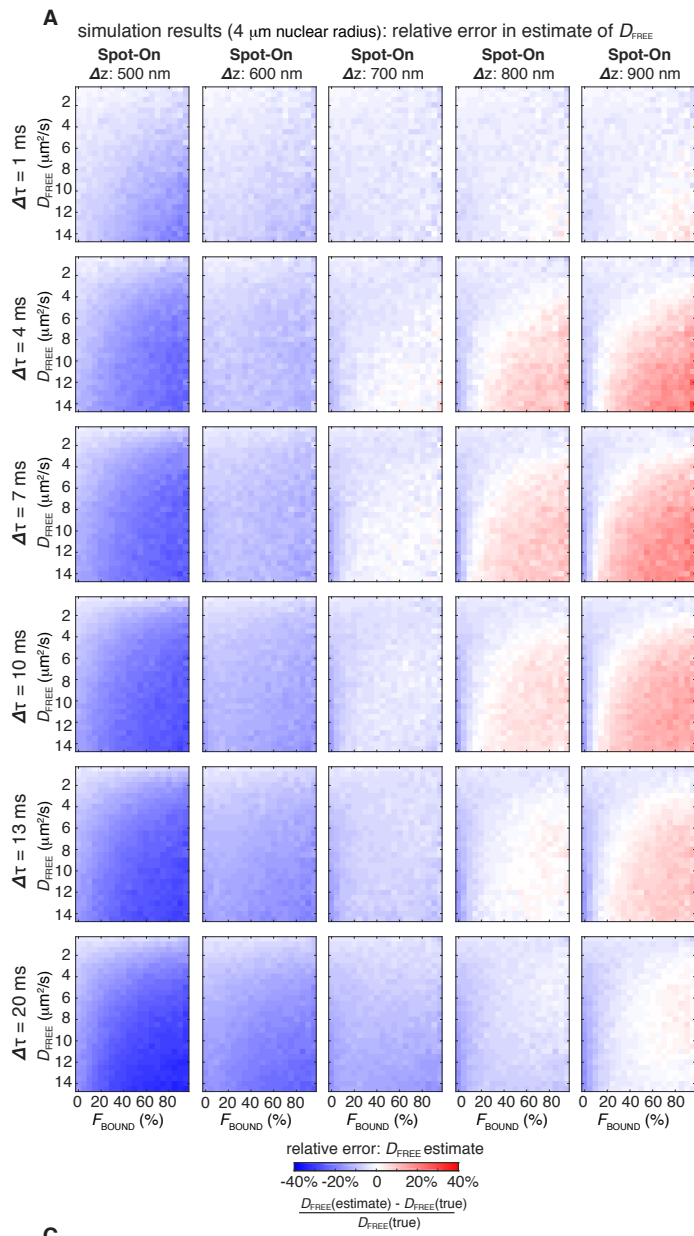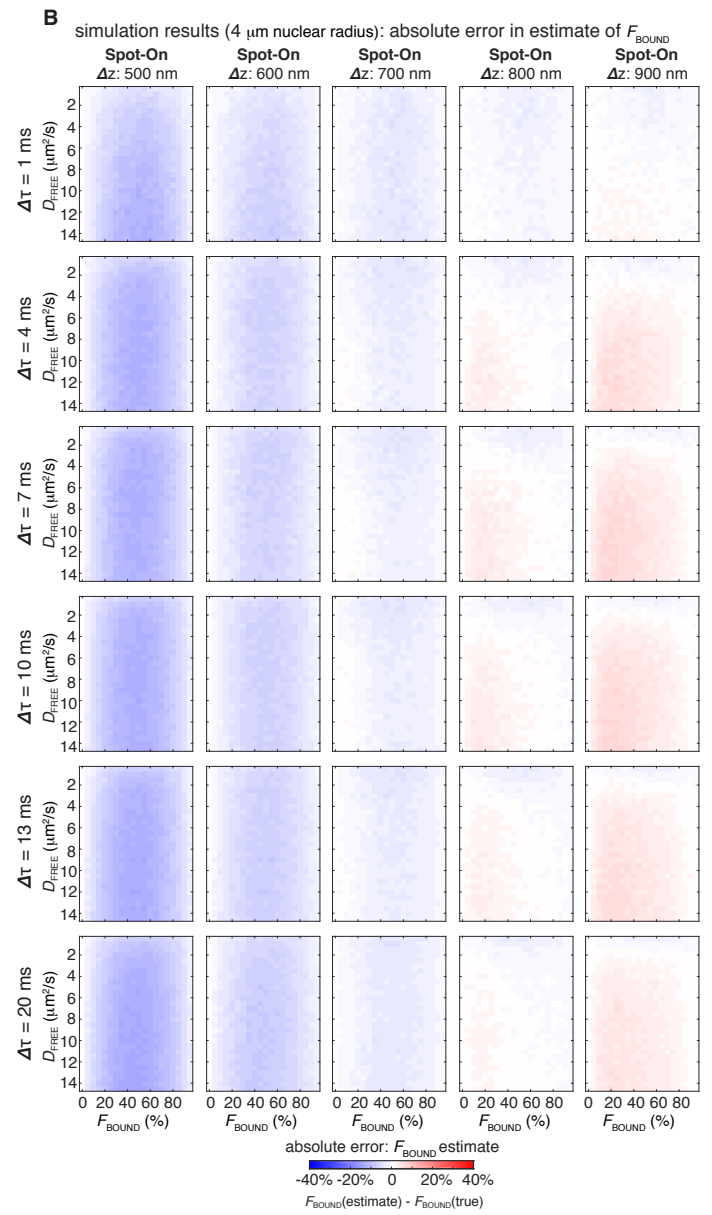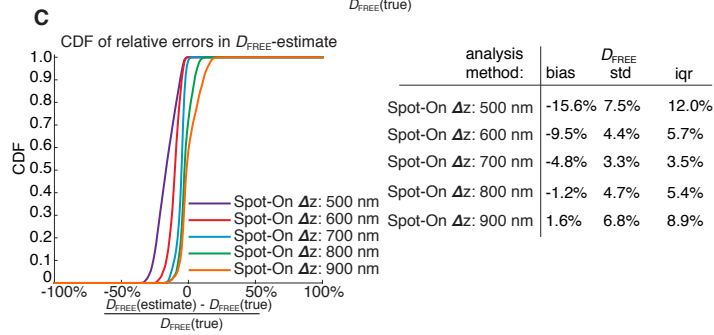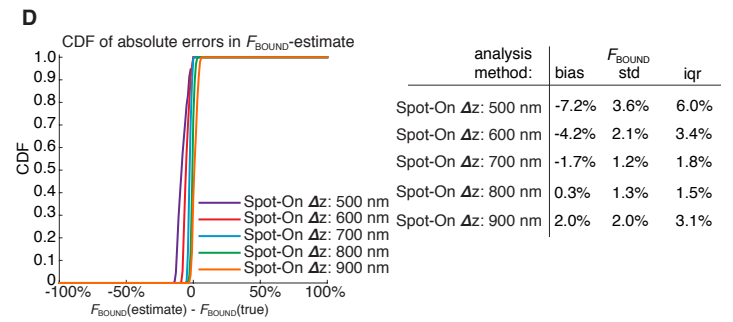

Supplement: supp [file elife-33125-supp-v1.zip]

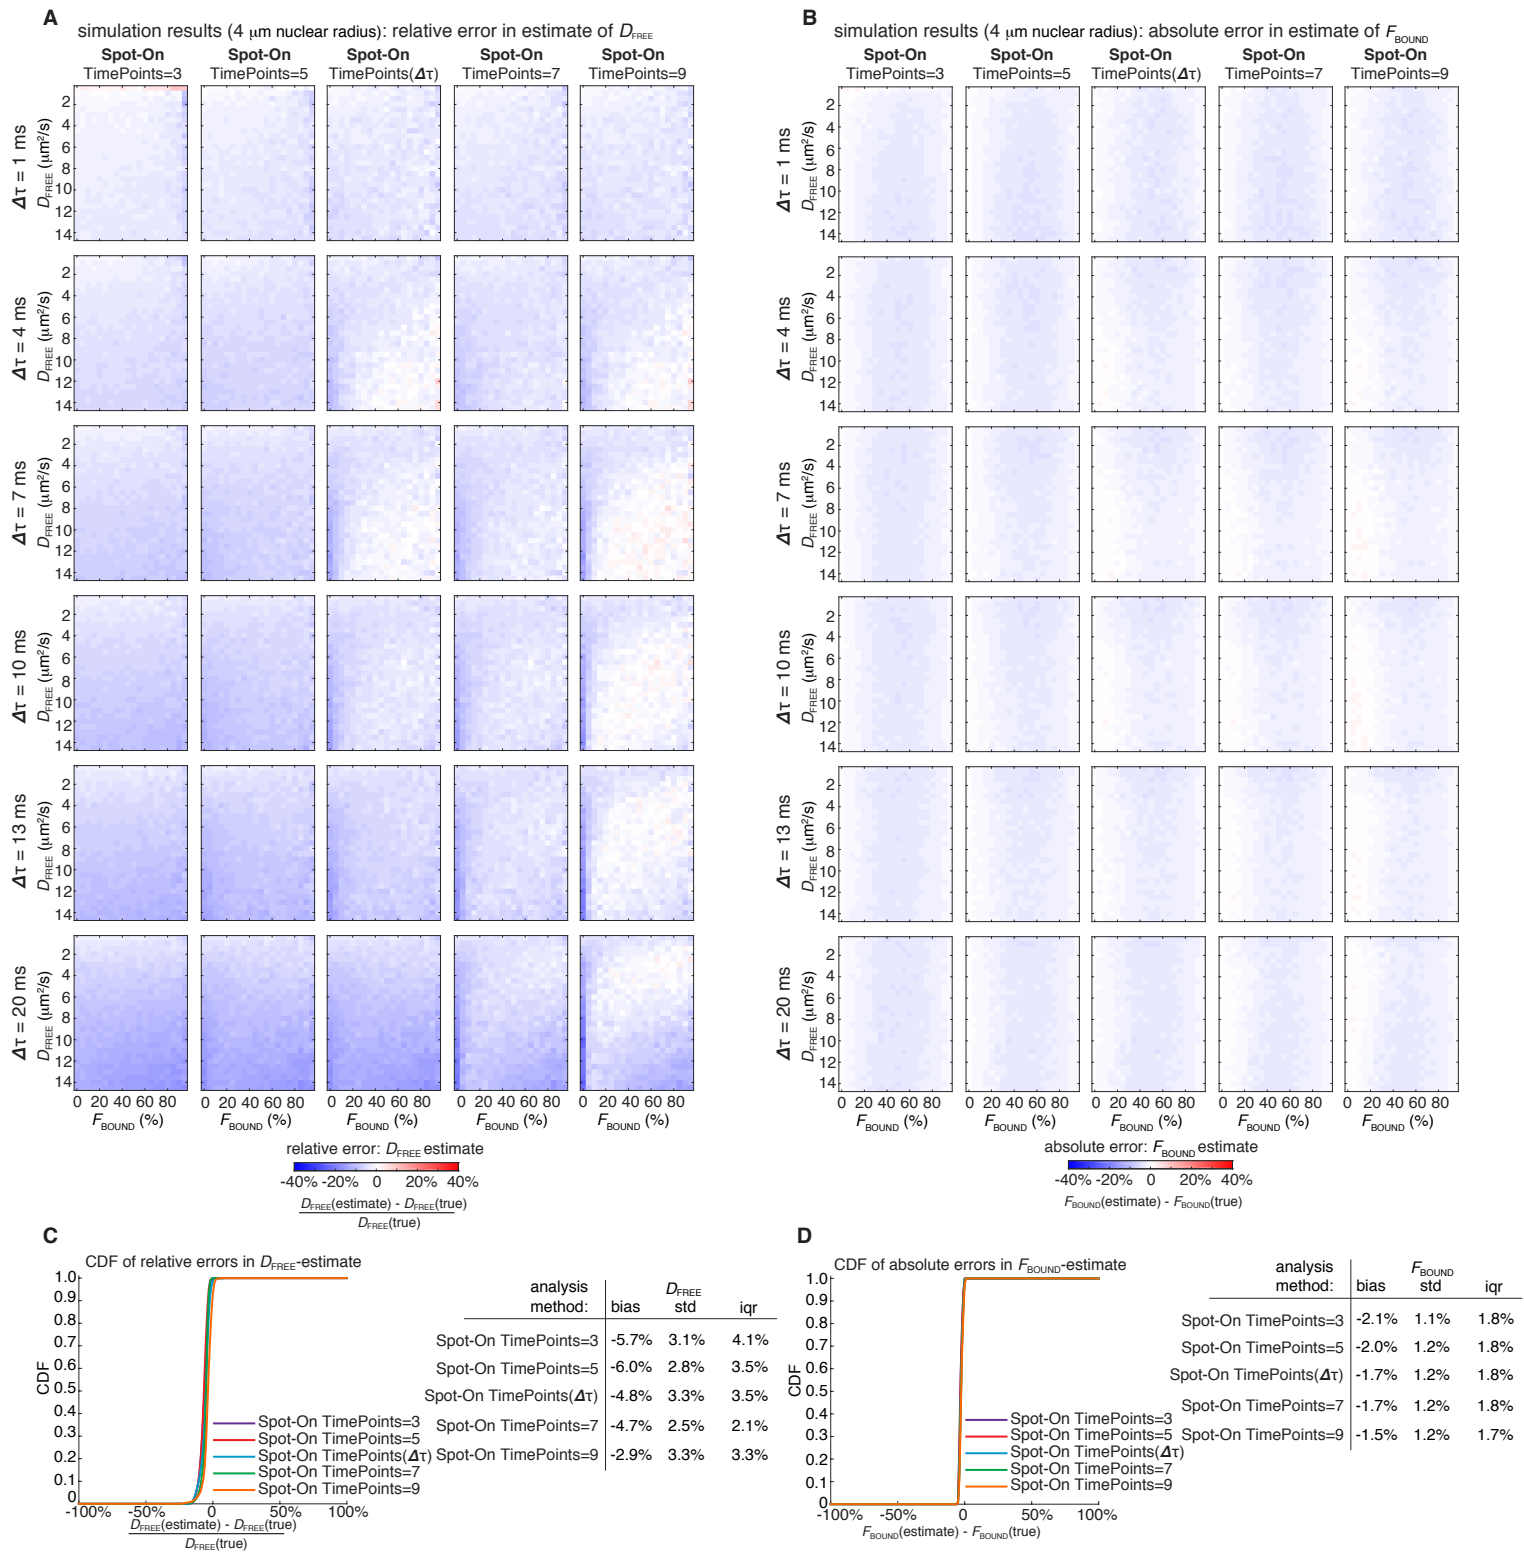

Supplement: supp [file elife-33125-supp-v1.zip]

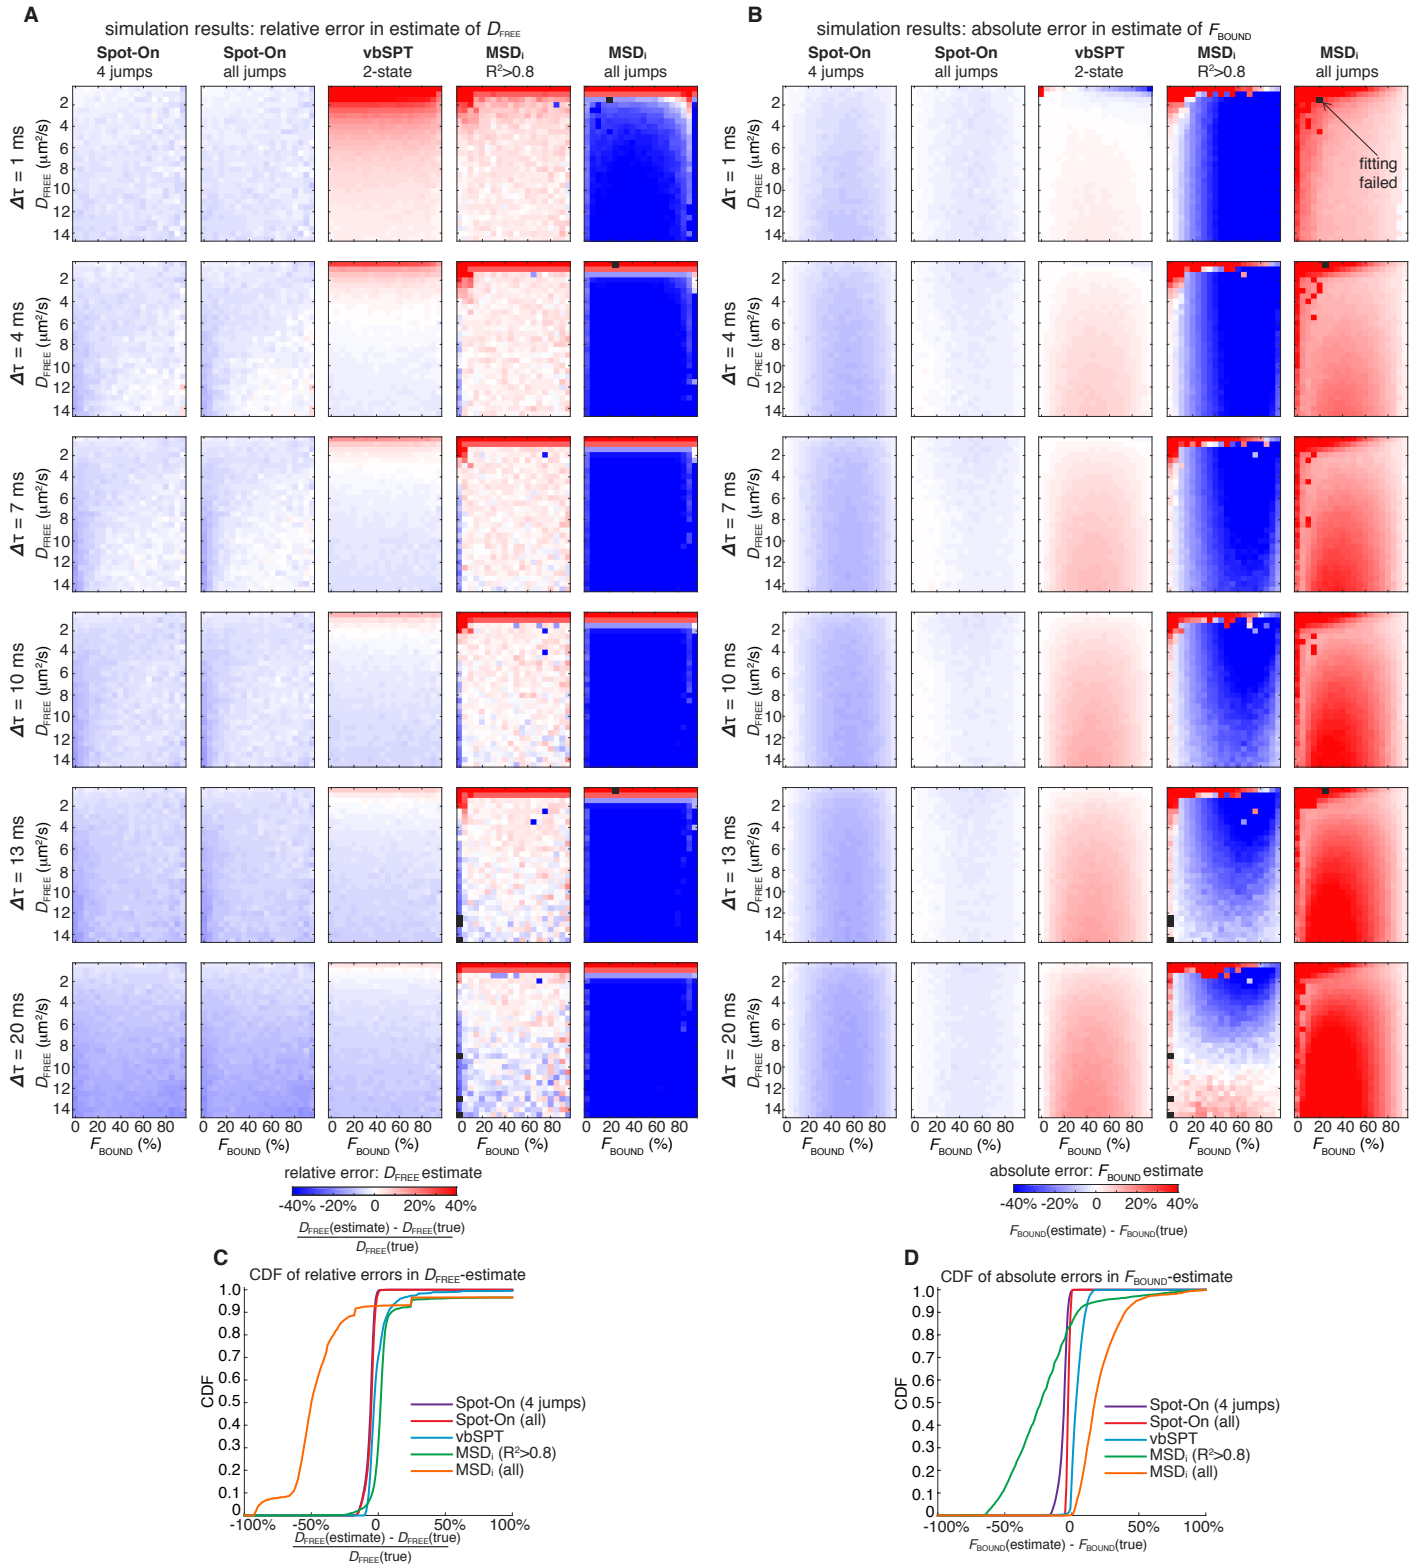

Supplement: supp [file elife-33125-supp-v1.zip]
